# Supplementary material for: Association of the USPSTF Grade D Recommendation Against Prostate-Specific Antigen Screening With Prostate Cancer–Specific Mortality
Source: PubMed Central journal article supplement (PMC9112070; doi:10.1001/jamanetworkopen.2022.11869), 2022-05-16
Supplement: jamanetwopen-e2211869-s001.pdf [file jamanetwopen-e2211869-s001.pdf]

## Supplementary Online Content

Burgess L, Aldrighetti CM, Ghosh A, et al. Association of the USPSTF Grade D recommendation against prostate-specific antigen screening with prostate cancer–specific mortality. *JAMA Netw Open*. 2022;5(5):e2211869.  
doi:10.1001/jamanetworkopen.2022.11869

**eTable 1.** 2013 US County and County Equivalent Urbanization

**eTable 2.** Census Region and Associated States

**eTable 3.** Demographics of Prostate Cancer–Specific Deaths in the United States, 1999–2019

**eTable 4.** Rate of Change in Age-Adjusted PCSM per 100,000 Population by Age

**eTable 5A.** Rate of Change in Age-Adjusted PCSM per 100,000 Population by Race

**eTable 5B.** Rate of Change in Age-Adjusted PCSM per 100,000 Population by Ethnicity

**eTable 6A.** Rate of Change in Age-Adjusted PCSM per 100,000 Population by Urbanization

**eTable 6B.** Rate of Change in Age-Adjusted PCSM per 100,000 Population by Census Region

**eTable 7.** Rate of Change in Diagnosis of Localized and Metastatic Prostate Cancer

**eTable 8.** Rate of Change in Age-Adjusted Overall Cancer Mortality for Men and Women and for Men Alone

**eFigure 1.** Age-Adjusted Rate of Prostate Cancer–Specific Mortality (PCSM) per 100,000 by Region

**eFigure 2.** Age-Adjusted Rate of Metastatic Prostate Cancer Diagnoses Over Time by Race and Ethnicity

This supplementary material has been provided by the authors to give readers additional information about their work.

**eTable 1.** 2013 US County and County Equivalent Urbanization: Classification as Either Metropolitan or Non-metropolitan and Subclassified Into Six Urbanization Levels Used for Analysis. Urbanization levels are determined by their metropolitan statistical area (MSA) derived from 2012 post-census estimates

| County Classification | Urbanization Level  | MSA Population    | Number of Counties | Distribution of U.S. Resident Population (%) |
|-----------------------|---------------------|-------------------|--------------------|----------------------------------------------|
| Metropolitan          | Large Central Metro | ≥1,000,000        | 68                 | 30.5                                         |
|                       | Large Fringe Metro  | 1,000,000         | 368                | 24.7                                         |
|                       | Medium              | 250,000 – 999,999 | 373                | 20.9                                         |
|                       | Small               | <250,000          | 358                | 9.2                                          |
| Non-Metropolitan      | Micropolitan        | 10,000 – 49,000   | 641                | 8.7                                          |
|                       | Non-Core            | *                 | 1335               | 6.1                                          |

\*MSA population cannot be determined for Non-core and should be considered most rural

**eTable 2.** Census Region and Associated States: 50 States and Washington D.C. Are Classified Into Four Regions.

| Census Region | Northeast                                                                                                                   | Midwest                                                                                                                                     | South                                                                                                                                                                                                                                | West                                                                                                                                         |
|---------------|-----------------------------------------------------------------------------------------------------------------------------|---------------------------------------------------------------------------------------------------------------------------------------------|--------------------------------------------------------------------------------------------------------------------------------------------------------------------------------------------------------------------------------------|----------------------------------------------------------------------------------------------------------------------------------------------|
| States        | Connecticut<br>Maine<br>Massachusetts<br>New Hampshire<br>New Jersey<br>New York<br>Pennsylvania<br>Rhode Island<br>Vermont | Illinois<br>Indiana<br>Iowa<br>Kansas<br>Michigan<br>Minnesota<br>Missouri<br>Nebraska<br>North Dakota<br>Ohio<br>South Dakota<br>Wisconsin | Alabama<br>Arkansas<br>Delaware<br>District of Columbia<br>Florida<br>Georgia<br>Kentucky<br>Louisiana<br>Maryland<br>Mississippi<br>North Carolina<br>Oklahoma<br>South Carolina<br>Tennessee<br>Texas<br>Virginia<br>West Virginia | Alaska<br>Arizona<br>California<br>Colorado<br>Hawaii<br>Idaho<br>Montana<br>Nevada<br>New Mexico<br>Oregon<br>Utah<br>Washington<br>Wyoming |

**eTable 3. Demographics of Prostate Cancer–Specific Deaths in the United States, 1999-2019**

| <b>Year</b>              | 1999          | 2000          | 2001          | 2002          | 2003          | 2004          | 2005          | 2006          | 2007          | 2008          | 2009          |
|--------------------------|---------------|---------------|---------------|---------------|---------------|---------------|---------------|---------------|---------------|---------------|---------------|
| <b>Demographic</b>       | 31729(5.13)   | 31078(5.03)   | 30719(4.97)   | 30446(4.93)   | 29554(4.78)   | 29004(4.69)   | 28905(4.68)   | 28372(4.59)   | 29093(4.71)   | 28472(4.61)   | 28088(4.54)   |
| <b>Age</b>               |               |               |               |               |               |               |               |               |               |               |               |
| <50                      | 137(0.43)     | 134(0.43)     | 131(0.43)     | 114(0.37)     | 127(0.43)     | 130(0.45)     | 122(0.42)     | 140(0.49)     | 118(0.41)     | 122(0.43)     | 110(0.39)     |
| 50-54                    | 274(0.86)     | 263(0.86)     | 313(0.86)     | 302(0.99)     | 319(0.86)     | 332(1.14)     | 302(1.04)     | 312(0.49)     | 334(1.15)     | 361(1.27)     | 347(1.24)     |
| 55-59                    | 636(2.00)     | 623(2.00)     | 647(2.00)     | 696(2.29)     | 669(2.00)     | 688(2.37)     | 762(2.64)     | 833(2.49)     | 784(2.69)     | 817(2.87)     | 815(2.90)     |
| 60-64                    | 1310(4.13)    | 1306(4.13)    | 1260(4.13)    | 1324(4.35)    | 1405(4.13)    | 1356(4.68)    | 1392(4.82)    | 1440(4.49)    | 1487(5.11)    | 1568(5.51)    | 1573(5.60)    |
| 65-69                    | 2711(8.54)    | 2466(8.54)    | 2379(8.54)    | 2316(7.61)    | 2288(8.54)    | 2196(7.57)    | 2215(7.66)    | 2209(8.49)    | 2282(7.84)    | 2365(8.31)    | 2305(8.21)    |
| 70-74                    | 4605(14.51)   | 4342(14.51)   | 4164(14.51)   | 3984(13.09)   | 3745(14.51)   | 3515(12.12)   | 3549(12.28)   | 3394(14.49)   | 3434(11.80)   | 3280(11.52)   | 3337(11.88)   |
| 75-79                    | 6532(20.59)   | 6314(20.59)   | 6119(20.59)   | 5915(19.43)   | 5671(20.59)   | 5444(18.77)   | 5222(18.07)   | 4924(20.49)   | 4984(17.13)   | 4744(16.66)   | 4502(16.03)   |
| 80-84                    | 6903(21.76)   | 6757(21.76)   | 6857(21.76)   | 6838(22.46)   | 6613(21.76)   | 6549(22.58)   | 6444(22.29)   | 6233(21.49)   | 6273(21.56)   | 5977(20.99)   | 5818(20.71)   |
| 85+                      | 8620(27.17)   | 8873(27.17)   | 8849(27.17)   | 8957(29.42)   | 8717(27.17)   | 8792(30.31)   | 8897(30.78)   | 8887(27.49)   | 9397(32.30)   | 9237(32.44)   | 9281(33.04)   |
| Age not reported         | 1(0.00)       | 0(0.00)       | 0(0.00)       | 0(0.00)       | 0(0.00)       | 2(0.01)       | 0(0.00)       | 0(0.49)       | 0(0.00)       | 1(0.00)       | 0(0.00)       |
| All                      | 31729(100.00) | 31078(100.00) | 30719(100.00) | 30446(100.00) | 29554(100.00) | 29004(100.00) | 28905(100.00) | 28372(100.49) | 29093(100.00) | 28472(100.00) | 28088(100.00) |
| <b>Race</b>              |               |               |               |               |               |               |               |               |               |               |               |
| White                    | 26005(81.96)  | 25340(81.96)  | 25066(81.96)  | 24918(81.84)  | 24232(81.96)  | 23727(81.81)  | 23597(81.64)  | 23202(81.49)  | 23666(81.35)  | 23362(82.05)  | 22777(81.09)  |
| Black                    | 5357(16.88)   | 5346(16.88)   | 5265(16.88)   | 5145(16.90)   | 4894(16.88)   | 4816(16.60)   | 4823(16.69)   | 4698(16.49)   | 4908(16.87)   | 4588(16.11)   | 4794(17.07)   |
| Other races              | 367(1.16)     | 392(1.16)     | 388(1.16)     | 383(1.26)     | 428(1.16)     | 461(1.59)     | 485(1.68)     | 472(1.49)     | 519(1.78)     | 522(1.83)     | 517(1.84)     |
| All                      | 31729(100.00) | 31078(100.00) | 30719(100.00) | 30446(100.00) | 29554(100.00) | 29004(100.00) | 28905(100.00) | 28372(100.49) | 29093(100.00) | 28472(100.00) | 28088(100.00) |
| <b>Ethnicity</b>         |               |               |               |               |               |               |               |               |               |               |               |
| Hispanic                 | 1050(3.31)    | 1033(3.31)    | 1226(3.31)    | 1209(3.97)    | 1219(3.31)    | 1239(4.27)    | 1300(4.50)    | 1373(3.49)    | 1432(4.92)    | 1436(5.04)    | 1436(5.11)    |
| Non-Hispanic             | 30614(96.49)  | 29964(96.49)  | 29407(96.49)  | 29151(95.75)  | 28279(96.49)  | 27723(95.58)  | 27566(95.37)  | 26946(96.49)  | 27633(94.98)  | 26980(94.76)  | 26604(94.72)  |
| Unknown                  | 65(0.20)      | 81(0.20)      | 86(0.20)      | 86(0.28)      | 56(0.20)      | 42(0.14)      | 39(0.13)      | 53(0.49)      | 28(0.10)      | 56(0.20)      | 48(0.17)      |
| All                      | 31729(100.00) | 31078(100.00) | 30719(100.00) | 30446(100.00) | 29554(100.00) | 29004(100.00) | 28905(100.00) | 28372(100.49) | 29093(100.00) | 28472(100.00) | 28088(100.00) |
| <b>Urbanization</b>      |               |               |               |               |               |               |               |               |               |               |               |
| Large central metro      | 8778(27.67)   | 8820(27.67)   | 8622(27.67)   | 8608(28.27)   | 8333(27.67)   | 8108(27.95)   | 8263(28.59)   | 7851(27.49)   | 7957(27.35)   | 7803(27.41)   | 7870(28.02)   |
| Large Fringe metro       | 6709(21.14)   | 6446(21.14)   | 6609(21.14)   | 6595(21.66)   | 6311(21.14)   | 6195(21.36)   | 6080(21.03)   | 6075(21.49)   | 6486(22.29)   | 6233(21.89)   | 6200(22.07)   |
| Medium Metro             | 6493(20.46)   | 6391(20.46)   | 6286(20.46)   | 6208(20.39)   | 6107(20.46)   | 6030(20.79)   | 6003(20.77)   | 6063(20.49)   | 6239(21.45)   | 6161(21.64)   | 5868(20.89)   |
| Small Metro              | 3155(9.94)    | 3131(9.94)    | 2975(9.94)    | 3000(9.85)    | 3034(9.94)    | 2917(10.06)   | 2885(9.98)    | 2900(9.49)    | 2774(9.53)    | 2861(10.05)   | 2809(10.00)   |
| Micropolitan (Non-Metro) | 3549(11.19)   | 3303(11.19)   | 3304(11.19)   | 3124(10.26)   | 3013(11.19)   | 3036(10.47)   | 3054(10.57)   | 2969(11.49)   | 3101(10.66)   | 2890(10.15)   | 2916(10.38)   |
| Non Core (Non-Metro)     | 3045(9.60)    | 2987(9.60)    | 2923(9.60)    | 2911(9.56)    | 2756(9.60)    | 2718(9.37)    | 2620(9.06)    | 2514(9.49)    | 2536(8.72)    | 2524(8.86)    | 2425(8.63)    |
| All                      | 31729(100.00) | 31078(100.00) | 30719(100.00) | 30446(100.00) | 29554(100.00) | 29004(100.00) | 28905(100.00) | 28372(100.49) | 29093(100.00) | 28472(100.00) | 28088(100.00) |
| <b>Census region</b>     |               |               |               |               |               |               |               |               |               |               |               |
| Northeast                | 6426(20.25)   | 6349(20.25)   | 6386(20.25)   | 6183(20.31)   | 6061(20.25)   | 5778(19.92)   | 5613(19.42)   | 5441(20.49)   | 5591(19.22)   | 5464(19.19)   | 5231(18.62)   |
| Midwest                  | 7681(24.21)   | 7491(24.21)   | 7374(24.21)   | 7175(23.57)   | 6921(24.21)   | 6887(23.75)   | 6708(23.21)   | 6507(24.49)   | 6786(23.33)   | 6596(23.17)   | 6410(22.82)   |
| South                    | 11574(36.48)  | 11268(36.48)  | 11110(36.48)  | 11000(36.13)  | 10596(36.48)  | 10430(35.96)  | 10475(36.24)  | 10511(36.49)  | 10566(36.32)  | 10270(36.07)  | 10251(36.50)  |
| West                     | 6048(19.06)   | 5970(19.06)   | 5849(19.06)   | 6088(20.00)   | 5976(19.06)   | 5909(20.37)   | 6109(21.13)   | 5913(19.49)   | 6150(21.14)   | 6142(21.57)   | 6196(22.06)   |
| All                      | 31729(100.00) | 31078(100.00) | 30719(100.00) | 30446(100.00) | 29554(100.00) | 29004(100.00) | 28905(100.00) | 28372(100.49) | 29093(100.00) | 28472(100.00) | 28088(100.00) |

| Year                     | 2010          | 2011          | 2012          | 2013          | 2014          | 2015          | 2016          | 2017          | 2018          | 2019          | Total          |
|--------------------------|---------------|---------------|---------------|---------------|---------------|---------------|---------------|---------------|---------------|---------------|----------------|
| <b>Demographic</b>       | 28561(4.62)   | 27970(4.53)   | 27245(4.41)   | 27682(4.48)   | 28344(4.59)   | 28848(4.67)   | 30370(4.91)   | 30488(4.93)   | 31489(5.09)   | 31638(5.12)   | 618095 (100)   |
| <b>Age</b>               |               |               |               |               |               |               |               |               |               |               |                |
| <50                      | 149(0.52)     | 109(0.39)     | 124(0.46)     | 119(0.43)     | 109(0.38)     | 86(0.30)      | 95(0.31)      | 86(0.28)      | 119(0.38)     | 105(0.33)     | 2486(0.40)     |
| 50-54                    | 367(1.28)     | 331(1.18)     | 388(1.42)     | 354(1.28)     | 333(1.17)     | 330(1.14)     | 325(1.07)     | 324(1.06)     | 318(1.01)     | 309(0.98)     | 6838(1.11)     |
| 55-59                    | 907(3.18)     | 842(3.01)     | 850(3.12)     | 878(3.17)     | 883(3.12)     | 889(3.08)     | 968(3.19)     | 855(2.80)     | 932(2.96)     | 915(2.89)     | 16889(2.73)    |
| 60-64                    | 1648(5.77)    | 1700(6.08)    | 1611(5.91)    | 1692(6.11)    | 1768(6.24)    | 1826(6.33)    | 1925(6.34)    | 1888(6.19)    | 1984(6.30)    | 2007(6.34)    | 33470(5.42)    |
| 65-69                    | 2452(8.59)    | 2412(8.62)    | 2481(9.11)    | 2613(9.44)    | 2886(10.18)   | 2814(9.75)    | 3048(10.04)   | 3184(10.44)   | 3174(10.08)   | 3188(10.08)   | 53984(8.73)    |
| 70-74                    | 3414(11.95)   | 3270(11.69)   | 3338(12.25)   | 3371(12.18)   | 3504(12.36)   | 3673(12.73)   | 3833(12.62)   | 4096(13.43)   | 4246(13.48)   | 4402(13.91)   | 78496(12.70)   |
| 75-79                    | 4435(15.53)   | 4350(15.55)   | 4236(15.55)   | 4187(15.13)   | 4331(15.28)   | 4409(15.28)   | 4641(15.28)   | 4755(15.60)   | 4992(15.85)   | 5054(15.97)   | 105761(17.11)  |
| 80-84                    | 5700(19.96)   | 5503(19.67)   | 5145(18.88)   | 5072(18.32)   | 5133(18.11)   | 5202(18.03)   | 5440(17.91)   | 5388(17.67)   | 5469(17.37)   | 5433(17.17)   | 124747(20.18)  |
| 85+                      | 9488(33.22)   | 9453(33.80)   | 9071(33.29)   | 9395(33.94)   | 9396(33.15)   | 9619(33.34)   | 10095(33.24)  | 9910(32.50)   | 10254(32.56)  | 10223(32.31)  | 195411(31.62)  |
| Age not reported         | 1(0.00)       | 0(0.00)       | 1(0.00)       | 1(0.00)       | 1(0.00)       | 0(0.00)       | 0(0.00)       | 2(0.01)       | 1(0.00)       | 2(0.01)       | 13(0.00)       |
| All                      | 28561(100.00) | 27970(100.00) | 27245(100)    | 27682(100.00) | 28344(100.00) | 28848(100.00) | 30370(100.00) | 30488(100.00) | 31489(100.00) | 31638(100.00) | 618095(100.00) |
| <b>Race</b>              |               |               |               |               |               |               |               |               |               |               |                |
| White                    | 23172(81.13)  | 22728(81.26)  | 22093(81.09)  | 22550(81.46)  | 23073(81.40)  | 23377(81.04)  | 24555(80.85)  | 24659(80.88)  | 25316(80.40)  | 25407(80.31)  | 502822(81.35)  |
| Black                    | 4854(17.00)   | 4658(16.65)   | 4596(16.87)   | 4528(16.36)   | 4613(16.28)   | 4742(16.44)   | 5088(16.75)   | 5065(16.61)   | 5291(16.80)   | 5410(17.10)   | 103479(16.74)  |
| Other races              | 535(1.87)     | 584(2.09)     | 556(2.04)     | 604(2.18)     | 658(2.32)     | 729(2.53)     | 727(2.39)     | 764(2.51)     | 882(2.80)     | 821(2.59)     | 11794(1.91)    |
| All                      | 28561(100.00) | 27970(100.00) | 27245(100.00) | 27682(100.00) | 28344(100.00) | 28848(100.00) | 30370(100.00) | 30488(100.00) | 31489(100.00) | 31638(100.00) | 618095(100.00) |
| <b>Ethnicity</b>         |               |               |               |               |               |               |               |               |               |               |                |
| Hispanic                 | 1535(5.37)    | 1576(5.63)    | 1592(5.84)    | 1634(5.90)    | 1707(6.02)    | 1867(6.47)    | 1929(6.35)    | 2011(6.60)    | 2115(6.72)    | 2135(6.75)    | 32054(5.19)    |
| Non-Hispanic             | 26973(94.44)  | 26343(94.18)  | 25596(93.95)  | 25983(93.86)  | 26538(93.63)  | 26908(93.28)  | 28361(93.38)  | 28405(93.17)  | 29297(93.04)  | 29440(93.05)  | 584711(94.60)  |
| Unknown                  | 53(0.19)      | 51(0.18)      | 57(0.21)      | 65(0.23)      | 99(0.35)      | 73(0.25)      | 80(0.26)      | 72(0.24)      | 77(0.24)      | 63(0.20)      | 1330(0.22)     |
| All                      | 28561(100.00) | 27970(100.00) | 27245(100.00) | 27682(100.00) | 28344(100.00) | 28848(100.00) | 30370(100.00) | 30488(100.00) | 31489(100.00) | 31638(100.00) | 618095(100.00) |
| <b>Urbanization</b>      |               |               |               |               |               |               |               |               |               |               |                |
| Large central metro      | 7936(27.79)   | 7921(28.32)   | 7607(27.92)   | 7691(27.78)   | 8012(28.27)   | 7931(27.49)   | 8557(28.18)   | 8421(27.62)   | 8743(27.77)   | 8877(28.06)   | 172709(27.94)  |
| Large Fringe metro       | 6283(22.00)   | 6232(22.28)   | 6015(22.08)   | 6318(22.82)   | 6446(22.74)   | 6610(22.91)   | 6912(22.76)   | 7163(23.49)   | 7220(22.93)   | 7373(23.30)   | 136511(22.09)  |
| Medium Metro             | 5992(20.98)   | 5777(20.65)   | 5747(21.09)   | 5755(20.79)   | 6039(21.31)   | 6149(21.32)   | 6321(20.81)   | 6473(21.23)   | 6735(21.39)   | 6688(21.14)   | 129525(20.96)  |
| Small Metro              | 2906(10.17)   | 2779(9.94)    | 2716(9.97)    | 2761(9.97)    | 2772(9.78)    | 2876(9.97)    | 3146(10.36)   | 2990(9.81)    | 3233(10.27)   | 3142(9.93)    | 61762(9.99)    |
| Micropolitan (Non-Metro) | 2934(10.27)   | 2921(10.44)   | 2790(10.24)   | 2778(10.04)   | 2776(9.79)    | 2956(10.25)   | 2966(9.77)    | 2997(9.83)    | 3120(9.91)    | 3113(9.84)    | 63610(10.29)   |
| Non Core (Non-Metro)     | 2510(8.79)    | 2340(8.37)    | 2370(8.70)    | 2379(8.59)    | 2299(8.11)    | 2326(8.06)    | 2468(8.13)    | 2444(8.02)    | 2438(7.74)    | 2445(7.73)    | 53978(8.73)    |
| All                      | 28561(100.00) | 27970(100.00) | 27245(100.00) | 27682(100.00) | 28344(100.00) | 28848(100.00) | 30370(100.00) | 30488(100.00) | 31489(100.00) | 31638(100.00) | 618095(100.00) |
| <b>Census region</b>     |               |               |               |               |               |               |               |               |               |               |                |
| Northeast                | 5458(19.11)   | 5318(19.01)   | 5024(18.44)   | 5112(18.47)   | 5207(18.37)   | 5079(17.61)   | 5398(17.77)   | 5439(17.84)   | 5391(17.12)   | 5296(16.74)   | 117245(18.97)  |
| Midwest                  | 6466(22.64)   | 6318(22.59)   | 6173(22.66)   | 6093(22.01)   | 6334(22.35)   | 6438(22.32)   | 6604(21.75)   | 6713(22.02)   | 6953(22.08)   | 6928(21.90)   | 141556(22.90)  |
| South                    | 10428(36.51)  | 10171(36.36)  | 10021(36.78)  | 10237(36.98)  | 10323(36.42)  | 10617(36.80)  | 11141(36.68)  | 11357(37.25)  | 11628(36.93)  | 11963(37.81)  | 225937(36.55)  |
| West                     | 6209(21.74)   | 6163(22.03)   | 6027(22.12)   | 6240(22.54)   | 6480(22.86)   | 6714(23.27)   | 7227(23.80)   | 6979(22.89)   | 7517(23.87)   | 7451(23.55)   | 133357(21.58)  |
| All                      | 28561(100.00) | 27970(100.00) | 27245(100.00) | 27682(100.00) | 28344(100.00) | 28848(100.00) | 30370(100.00) | 30488(100.00) | 31489(100.00) | 31638(100)    | 618095(100.00) |

**eTable 4.** Rate of Change in Age-Adjusted PCSM per 100,000 Population by Age

| Age Group | Rate of change in age-adjusted PCSM (per 100,000 population) pre-2013 | Rate of change in age-adjusted PCSM (per 100,000 population) post-2013 | Absolute difference between age-adjusted PCSM rates of change pre-2013 and post-2013* | p-value          |
|-----------|-----------------------------------------------------------------------|------------------------------------------------------------------------|---------------------------------------------------------------------------------------|------------------|
| 50 – 54   | +0.000017                                                             | +0.00059                                                               | 0.000573                                                                              | 0.20             |
| 55 – 59   | -0.0018                                                               | +0.00053                                                               | 0.00233                                                                               | 0.47             |
| 60 – 64   | -0.0088                                                               | +0.0014                                                                | 0.0103                                                                                | <b>&lt;0.001</b> |
| 65 – 69   | -0.024                                                                | +0.0011                                                                | 0.0251                                                                                | <b>&lt;0.001</b> |
| 70 – 74   | -0.042                                                                | -0.0026                                                                | 0.0016                                                                                | <b>&lt;0.001</b> |
| 75 – 79   | -0.065                                                                | -0.011                                                                 | 0.0045                                                                                | <b>&lt;0.001</b> |
| 80 – 84   | -0.069                                                                | -0.0098                                                                | 0.0592                                                                                | <b>&lt;0.001</b> |
| 85+       | -0.062                                                                | +0.0078                                                                | 0.0698                                                                                | <b>&lt;0.001</b> |
| All ages  | -0.273                                                                | -0.009                                                                 | 0.264                                                                                 | <b>&lt;0.001</b> |

\*To evaluate the differences in rates of change in age-adjusted PCSM we subtracted the post-2013 age-adjusted rate of PCSM from the pre-2013 age-adjusted rate of PCSM to understand the magnitude of change in the rate of age-adjusted PCSM between these time periods

**eTable 5A.** Rate of Change in Age-Adjusted PCSM per 100,000 Population by Race

| Race                      | Age Group | Rate of change in age-adjusted PCSM (per 100,000 population) pre-2013 | Rate of change in age-adjusted PCSM (per 100,000 population) post-2013 | Absolute difference between age-adjusted PCSM rates of change pre-2013 and post-2013* | p-value          |
|---------------------------|-----------|-----------------------------------------------------------------------|------------------------------------------------------------------------|---------------------------------------------------------------------------------------|------------------|
| Black or African American | 50 – 54   | -0.0032                                                               | +0.0088                                                                | 0.012                                                                                 | 0.12             |
|                           | 55 – 59   | -0.0098                                                               | +0.0056                                                                | 0.0154                                                                                | <b>0.02</b>      |
|                           | 60 – 64   | -0.03                                                                 | +0.0099                                                                | 0.0399                                                                                | <b>0.001</b>     |
|                           | 65 – 69   | -0.06                                                                 | +0.025                                                                 | 0.085                                                                                 | <b>0.001</b>     |
|                           | 70 – 74   | -0.12                                                                 | -0.028                                                                 | 0.092                                                                                 | <b>0.007</b>     |
|                           | 75 – 79   | -0.18                                                                 | -0.06                                                                  | 0.12                                                                                  | <b>&lt;0.001</b> |
|                           | 80 – 84   | -0.17                                                                 | -0.032                                                                 | 0.138                                                                                 | <b>&lt;0.001</b> |
|                           | 85+       | -0.14                                                                 | -0.03                                                                  | 0.11                                                                                  | 0.06             |
|                           | All ages  | -0.700                                                                | -0.091                                                                 | 0.609                                                                                 | <b>&lt;0.001</b> |
| White                     | 50 – 54   | +0.00009                                                              | -0.00065                                                               | 0.00074                                                                               | 0.48             |
|                           | 55 – 59   | -0.0014                                                               | -0.00017                                                               | 0.00123                                                                               | 0.84             |
|                           | 60 – 64   | -0.0063                                                               | -0.00035                                                               | 0.00595                                                                               | <b>&lt;0.001</b> |
|                           | 65 – 69   | -0.019                                                                | -0.0039                                                                | 0.0151                                                                                | <b>&lt;0.001</b> |
|                           | 70 – 74   | -0.036                                                                | +0.000017                                                              | 0.036017                                                                              | <b>&lt;0.001</b> |
|                           | 75 – 79   | -0.056                                                                | -0.0038                                                                | 0.0522                                                                                | <b>&lt;0.001</b> |
|                           | 80 – 84   | -0.06                                                                 | -0.0083                                                                | 0.0517                                                                                | <b>&lt;0.001</b> |
|                           | 85+       | -0.055                                                                | +0.014                                                                 | 0.069                                                                                 | <b>&lt;0.001</b> |
|                           | All ages  | -0.238                                                                | +0.006                                                                 | 0.244                                                                                 | <b>&lt;0.001</b> |

\*To evaluate the differences in rates of change in age-adjusted PCSM we subtracted the post-2013 age-adjusted rate of PCSM from the pre-2013 age-adjusted rate of PCSM to understand the magnitude of change in the rate of age-adjusted PCSM between these time periods

**eTable 5B.** Rate of Change in Age-Adjusted PCSM per 100,000 Population by Ethnicity

| Ethnicity              | Age Group | Rate of change in age-adjusted PCSM (per 100,000 population) pre-2013 | Rate of change in age-adjusted PCSM (per 100,000 population) post-2013 | Absolute difference between age-adjusted PCSM rates of change pre-2013 and post-2013* | p-value          |
|------------------------|-----------|-----------------------------------------------------------------------|------------------------------------------------------------------------|---------------------------------------------------------------------------------------|------------------|
| Hispanic or Latino     | 50 – 54   | -0.0016                                                               | -0.0023                                                                | 0.0007                                                                                | 0.68             |
|                        | 55 – 59   | -0.0026                                                               | -0.0002                                                                | 0.0024                                                                                | 0.61             |
|                        | 60 – 64   | -0.0015                                                               | -0.0014                                                                | 0.0001                                                                                | 0.61             |
|                        | 65 – 69   | -0.015                                                                | -0.0061                                                                | 0.0089                                                                                | 0.74             |
|                        | 70 – 74   | -0.022                                                                | -0.019                                                                 | 0.003                                                                                 | 0.77             |
|                        | 75 – 79   | -0.046                                                                | -0.0024                                                                | 0.0436                                                                                | 0.09             |
|                        | 80 – 84   | -0.039                                                                | -0.033                                                                 | 0.006                                                                                 | 0.72             |
|                        | 85+       | -0.052                                                                | +0.026                                                                 | 0.078                                                                                 | 0.07             |
|                        | All ages  | -0.169                                                                | -0.046                                                                 | 0.123                                                                                 | 0.12             |
| Non-Hispanic or Latino | 50 – 54   | +0.00023                                                              | +0.0013                                                                | 0.00107                                                                               | 0.11             |
|                        | 55 – 59   | -0.0017                                                               | +0.001                                                                 | 0.0027                                                                                | 0.32             |
|                        | 60 – 64   | -0.0086                                                               | +0.0023                                                                | 0.0109                                                                                | <b>&lt;0.001</b> |
|                        | 65 – 69   | -0.023                                                                | +0.0027                                                                | 0.0257                                                                                | <b>&lt;0.001</b> |
|                        | 70 – 74   | -0.042                                                                | -0.000098                                                              | 0.041902                                                                              | <b>&lt;0.001</b> |
|                        | 75 – 79   | -0.064                                                                | -0.011                                                                 | 0.053                                                                                 | <b>&lt;0.001</b> |
|                        | 80 – 84   | -0.068                                                                | -0.0071                                                                | 0.0609                                                                                | <b>&lt;0.001</b> |
|                        | 85+       | -0.062                                                                | +0.0084                                                                | 0.0704                                                                                | <b>&lt;0.001</b> |
|                        | All ages  | -0.271                                                                | -0.003                                                                 | 0.268                                                                                 | <b>&lt;0.001</b> |

\*To evaluate the differences in rates of change in age-adjusted PCSM we subtracted the post-2013 age-adjusted rate of PCSM from the pre-2013 age-adjusted rate of PCSM to understand the magnitude of change in the rate of age-adjusted PCSM between these time periods



**eTable 6A.** Rate of Change in Age-Adjusted PCSM per 100,000 Population by Urbanization

| Urbanization           | Rate of change in age-adjusted PCSM (per 100,000 population) pre-2013 | Rate of change in age-adjusted PCSM (per 100,000 population) post-2013 | Absolute difference between age-adjusted PCSM rates of change pre-2013 and post-2013* | p-value          |
|------------------------|-----------------------------------------------------------------------|------------------------------------------------------------------------|---------------------------------------------------------------------------------------|------------------|
| Large Central Metro    | -0.25                                                                 | -0.026                                                                 | 0.224                                                                                 | <b>&lt;0.001</b> |
| Large Fringe Metro     | -0.26                                                                 | -0.0012                                                                | 0.2588                                                                                | <b>&lt;0.001</b> |
| Medium Metro           | -0.27                                                                 | -0.023                                                                 | 0.247                                                                                 | <b>&lt;0.001</b> |
| Small Metro            | -0.28                                                                 | +0.022                                                                 | 0.302                                                                                 | <b>&lt;0.001</b> |
| Micropolitan Non-Metro | -0.27                                                                 | +0.024                                                                 | 0.294                                                                                 | <b>&lt;0.001</b> |
| Non-Core Non-Metro     | -0.3                                                                  | -0.036                                                                 | 0.264                                                                                 | <b>&lt;0.001</b> |
| All Categories         | -0.27                                                                 | -0.0086                                                                | 0.2614                                                                                | <b>&lt;0.001</b> |

\*To evaluate the differences in rates of change in age-adjusted PCSM we subtracted the post-2013 age-adjusted rate of PCSM from the pre-2013 age-adjusted rate of PCSM to understand the magnitude of change in the rate of age-adjusted PCSM between these time periods

**eTable 6B.** Rate of Change in Age-Adjusted PCSM per 100,000 Population by Census Region

| Census Region | Rate of change in age-adjusted PCSM (per 100,000 population) pre-2013 | Rate of change in age-adjusted PCSM (per 100,000 population) post-2013 | Absolute difference between age-adjusted PCSM rates of change pre-2013 and post-2013* | p-value          |
|---------------|-----------------------------------------------------------------------|------------------------------------------------------------------------|---------------------------------------------------------------------------------------|------------------|
| Northeast     | -0.27                                                                 | -0.074                                                                 | 0.196                                                                                 | <b>&lt;0.001</b> |
| Midwest       | -0.28                                                                 | +0.0092                                                                | 0.2892                                                                                | <b>&lt;0.001</b> |
| South         | -0.3                                                                  | -0.0032                                                                | 0.2968                                                                                | <b>&lt;0.001</b> |
| West          | -0.22                                                                 | +0.0065                                                                | 0.2265                                                                                | <b>&lt;0.001</b> |
| All Regions   | -0.27                                                                 | -0.0086                                                                | 0.2614                                                                                | <b>&lt;0.001</b> |

\*To evaluate the differences in rates of change in age-adjusted PCSM we subtracted the post-2013 age-adjusted rate of PCSM from the pre-2013 age-adjusted rate of PCSM to understand the magnitude of change in the rate of age-adjusted PCSM between these time periods

**eTable 7.** Rate of Change in Diagnosis of Localized and Metastatic Prostate Cancer

| Diagnosis              | Age Group | Rate of change in age-adjusted diagnosis of prostate cancer (per 100,000 population) pre-2013 | Rate of change in age-adjusted diagnosis of prostate cancer (per 100,000 population) post-2013 | Absolute difference between age-adjusted diagnosis of prostate cancer change pre-2013 and post-2013* | p-value          |
|------------------------|-----------|-----------------------------------------------------------------------------------------------|------------------------------------------------------------------------------------------------|------------------------------------------------------------------------------------------------------|------------------|
| Localized <sup>‡</sup> | 50 – 54   | -0.19                                                                                         | -0.046                                                                                         | 0.144                                                                                                | 0.21             |
|                        | 55 – 59   | -0.37                                                                                         | -0.024                                                                                         | 0.346                                                                                                | 0.07             |
|                        | 60 – 64   | -0.54                                                                                         | +0.015                                                                                         | 0.555                                                                                                | <b>0.04</b>      |
|                        | 65 – 69   | -0.64                                                                                         | -0.038                                                                                         | 0.602                                                                                                | 0.08             |
|                        | 70 – 74   | -0.74                                                                                         | +0.054                                                                                         | 0.794                                                                                                | <b>0.04</b>      |
|                        | 75 – 79   | -0.59                                                                                         | +0.067                                                                                         | 0.657                                                                                                | <b>0.03</b>      |
|                        | 80 – 84   | -0.28                                                                                         | +0.016                                                                                         | 0.296                                                                                                | <b>0.01</b>      |
|                        | 85+       | -0.13                                                                                         | -0.0066                                                                                        | 0.1234                                                                                               | <b>0.008</b>     |
| Metastatic             | 50 – 54   | +0.0024                                                                                       | +0.0044                                                                                        | 0.002                                                                                                | <b>0.03</b>      |
|                        | 55 – 59   | +0.0017                                                                                       | +0.0024                                                                                        | 0.0007                                                                                               | <b>&lt;0.001</b> |
|                        | 60 – 64   | +0.00047                                                                                      | +0.017                                                                                         | 0.01653                                                                                              | <b>&lt;0.001</b> |
|                        | 65 – 69   | -0.0016                                                                                       | +0.029                                                                                         | 0.0306                                                                                               | <b>&lt;0.001</b> |
|                        | 70 – 74   | -0.0024                                                                                       | +0.031                                                                                         | 0.0334                                                                                               | <b>&lt;0.001</b> |
|                        | 75 – 79   | -0.0038                                                                                       | +0.03                                                                                          | 0.0338                                                                                               | <b>&lt;0.001</b> |
|                        | 80 – 84   | -0.0025                                                                                       | +0.03                                                                                          | 0.0325                                                                                               | <b>&lt;0.001</b> |
|                        | 85+       | +0.00064                                                                                      | +0.025                                                                                         | 0.02436                                                                                              | <b>&lt;0.001</b> |

\*To evaluate the differences in rates of change in age-adjusted diagnosis of prostate cancer, we subtracted the post-2013 age-adjusted rate of prostate cancer diagnoses from the pre-2013 age-adjusted rate of prostate cancer diagnoses to understand the magnitude of change in the rate of age-adjusted prostate cancer diagnoses between these time periods

<sup>‡</sup>Localized prostate cancer trends were analyzed from 2008-2012 and from 2014-2017

**eTable 8.** Rate of Change in Age-Adjusted Overall Cancer Mortality\*\* for Men and Women and for Men Alone

| Sex           | Age Group | Rate of change in age-adjusted overall cancer mortality (per 100,000 population) pre-2013 | Rate of change in age-adjusted overall cancer mortality (per 100,000 population) post-2013 | Absolute difference between age-adjusted overall cancer mortality rates of change pre-2013 and post-2013* | p-value          |
|---------------|-----------|-------------------------------------------------------------------------------------------|--------------------------------------------------------------------------------------------|-----------------------------------------------------------------------------------------------------------|------------------|
| Men           | 50 – 54   | -0.13                                                                                     | -0.34                                                                                      | 0.21                                                                                                      | <b>&lt;0.001</b> |
|               | 55 – 59   | -0.23                                                                                     | -0.4                                                                                       | 0.17                                                                                                      | <b>0.05</b>      |
|               | 60 – 64   | -0.41                                                                                     | -0.3                                                                                       | 0.11                                                                                                      | <b>&lt;0.001</b> |
|               | 65 – 69   | -0.58                                                                                     | -0.33                                                                                      | 0.25                                                                                                      | <b>&lt;0.001</b> |
|               | 70 – 74   | -0.75                                                                                     | -0.77                                                                                      | 0.02                                                                                                      | 0.09             |
|               | 75 – 79   | -0.71                                                                                     | -0.75                                                                                      | 0.04                                                                                                      | 0.25             |
|               | 80 – 84   | -0.46                                                                                     | -0.56                                                                                      | 0.1                                                                                                       | <b>0.04</b>      |
|               | 85+       | -0.5                                                                                      | -0.46                                                                                      | 0.04                                                                                                      | 0.9              |
| Men and Women | 50 – 54   | -0.13                                                                                     | -0.28                                                                                      | 0.15                                                                                                      | <b>&lt;0.001</b> |
|               | 55 – 59   | -0.23                                                                                     | -0.29                                                                                      | 0.06                                                                                                      | <b>0.005</b>     |
|               | 60 – 64   | -0.35                                                                                     | -0.19                                                                                      | 0.16                                                                                                      | <b>&lt;0.001</b> |
|               | 65 – 69   | -0.43                                                                                     | -0.32                                                                                      | 0.11                                                                                                      | <b>0.007</b>     |
|               | 70 – 74   | -0.5                                                                                      | -0.61                                                                                      | 0.11                                                                                                      | <b>0.05</b>      |
|               | 75 – 79   | -0.41                                                                                     | -0.6                                                                                       | 0.19                                                                                                      | <b>&lt;0.001</b> |
|               | 80 – 84   | -0.23                                                                                     | -0.39                                                                                      | 0.16                                                                                                      | <b>&lt;0.001</b> |
|               | 85+       | -0.18                                                                                     | -0.21                                                                                      | 0.03                                                                                                      | 0.33             |

\*To evaluate the differences in rates of change in age-adjusted overall cancer mortality we subtracted the post-2013 age-adjusted rate of overall cancer mortality from the pre-2013 age-adjusted rate of overall cancer mortality to understand the magnitude of change in the rate of age-adjusted overall cancer mortality between these time periods

\*\*Overall cancer mortality rates excluded prostate cancer mortality

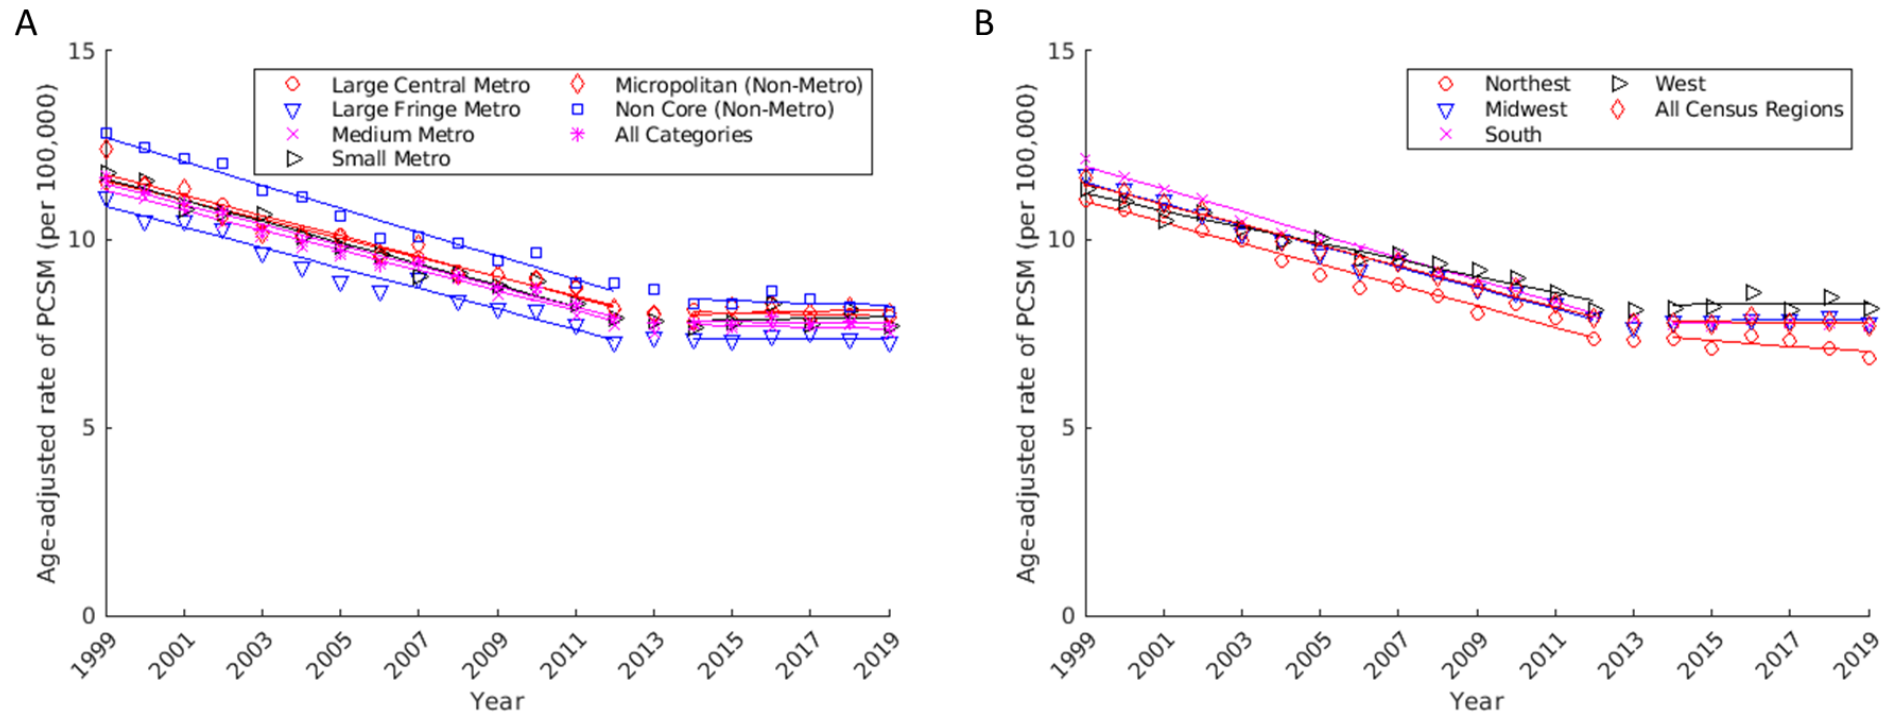

**eFigure 1.** Age-Adjusted Rate of Prostate Cancer–Specific Mortality (PCSM) per 100,000 by Region

By region, the age-adjusted rate of PCSM was steadily decreasing yearly between 1999-2012 and significantly ( $p < 0.001$ ) flattened after 2013 across all (A) urbanization categories and (B) census regions.

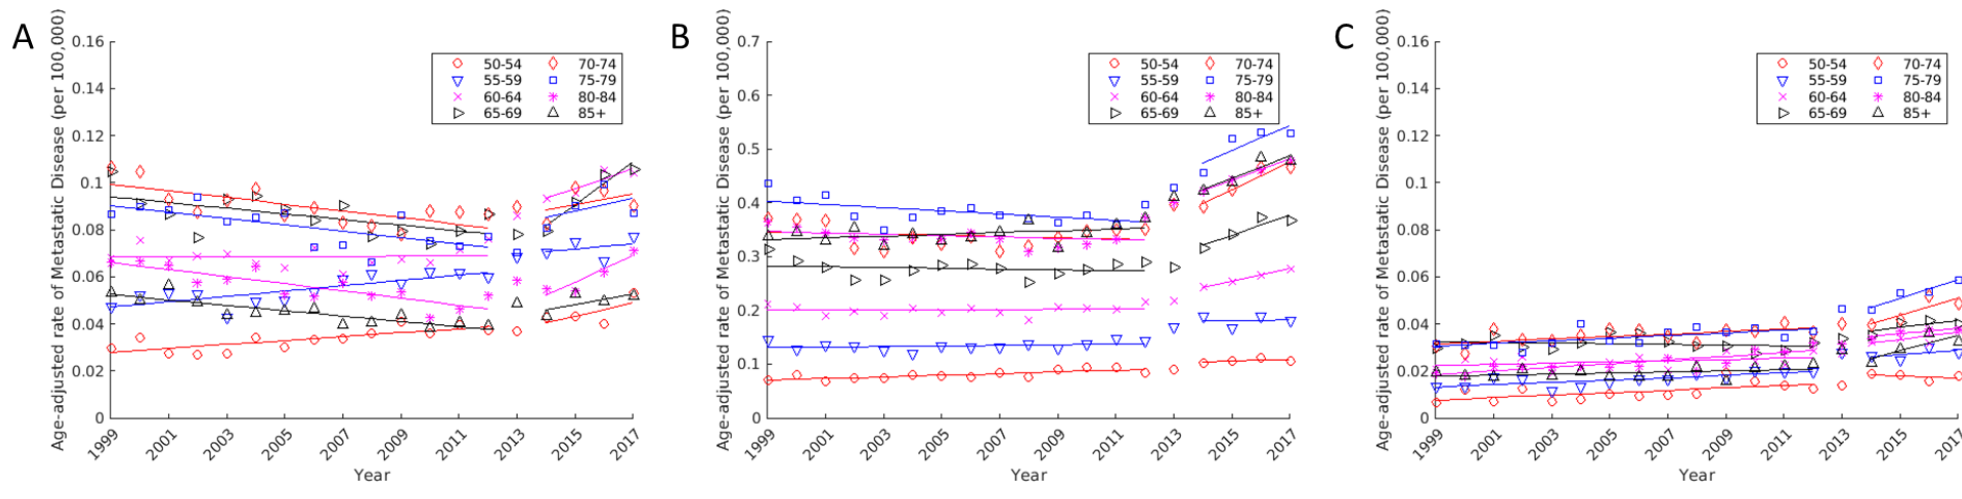

**eFigure 2.** Age-Adjusted Rate of Metastatic Prostate Cancer Diagnoses Over Time by Race and Ethnicity. (A) In Black men, (B) White men and (C) Hispanic men, there was a significant increase in the age-adjusted rate of diagnosis of metastatic prostate cancer per 100,000 post-2013 in all age groups.
